# Supplementary material
Source: PubMed Central journal article supplement (PMC9536112)
Supplement: NIHMS1836175-supplement-Supplementary_Figures_and_Table.pdf [file NIHMS1836175-supplement-Supplementary_Figures_and_Table.pdf]

# **Profiling epigenetic age in single cells**

Alexandre Trapp, Csaba Kerepesi, Vadim N. Gladyshev\*

Division of Genetics, Department of Medicine, Brigham and Women's Hospital,

Harvard Medical School, Boston, MA 02115, USA

\* Corresponding author. E-mail: [vgladyshev@rics.bwh.harvard.edu](mailto:vgladyshev@rics.bwh.harvard.edu)

**SUPPLEMENTARY INFORMATION**

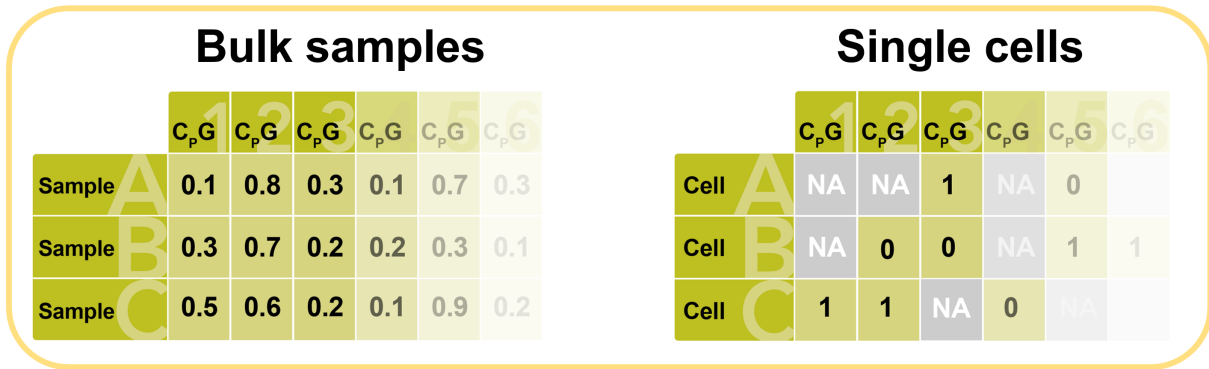

**Supplementary Figure 1: Comparison of bulk and single-cell methylation profiling outputs**  
 Schematic comparison of bulk (left) and single-cell (right) methylation sequencing approaches. Using bulk tissue ensures high and consistent CpG coverage across samples, while genome-wide single-cell profiles suffer from effectively random and sparse coverage of reads. In turn, bulk samples produce continuous fractional methylation values ranging from 0 to 1 (due to the presence of reads from many different cells), while single-cell samples exhibit primarily binarized methylation (0 or 1), with many missing values for each single cell. Consequently, dense feature tables used to train elastic net regression models for traditional epigenetic clock construction are currently unfeasible to create in single cells.

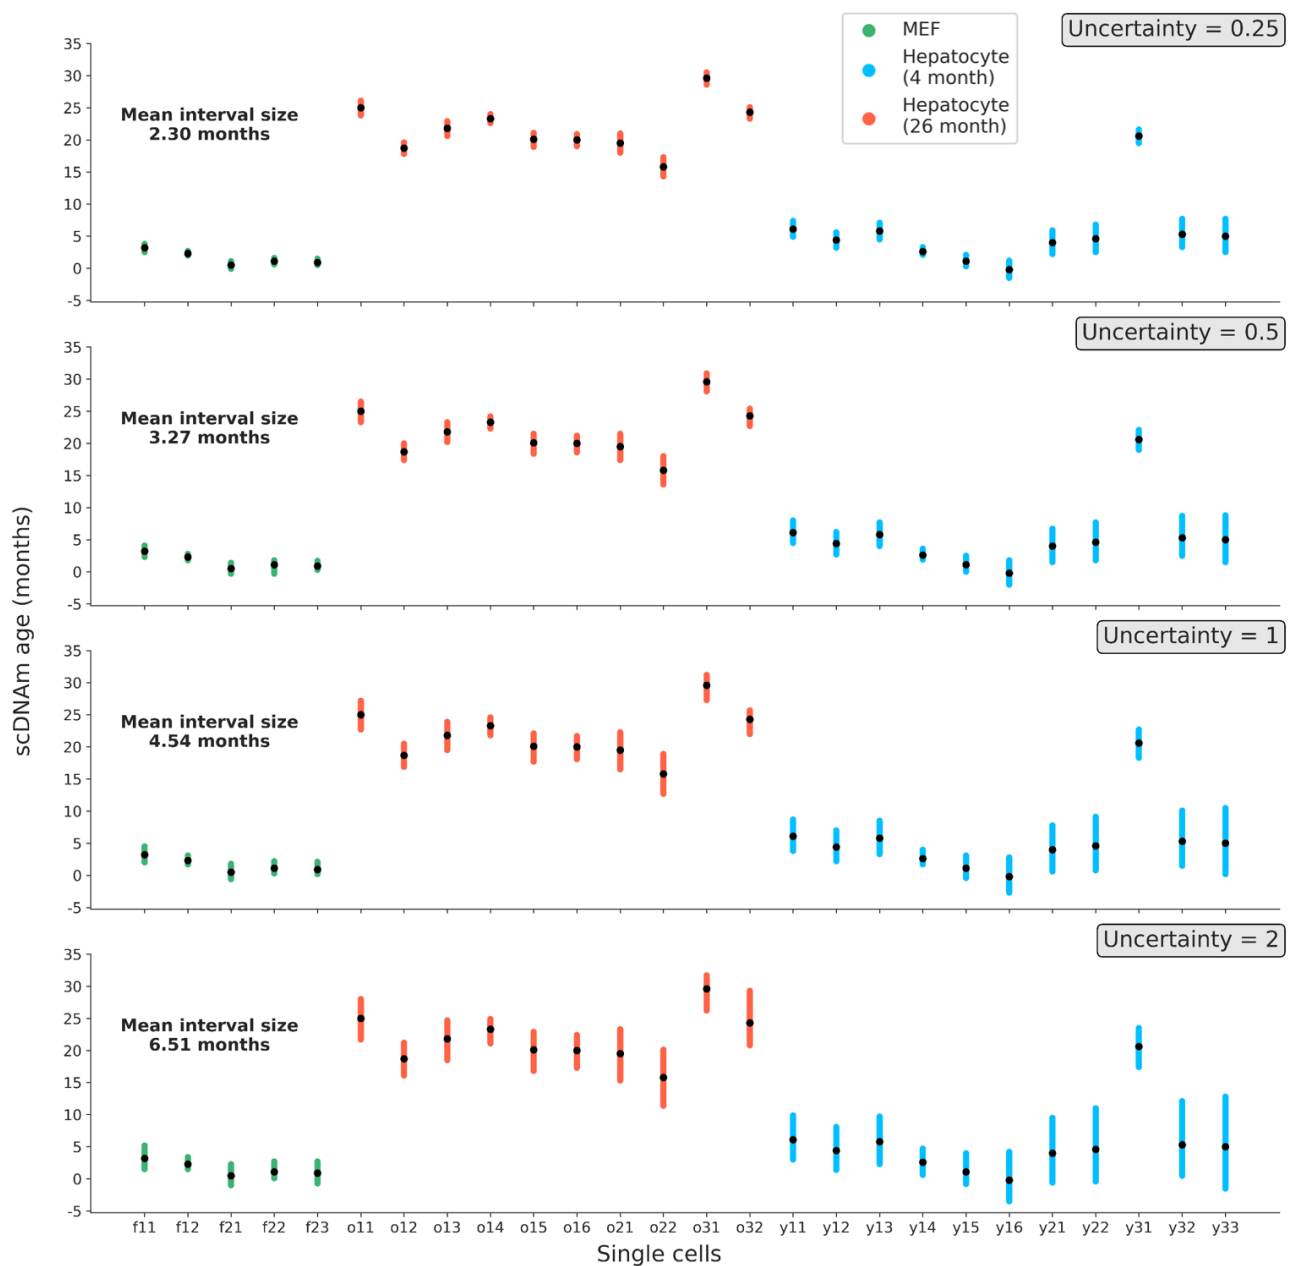

### Supplementary Figure 2: Confidence interval computation for scDNAm predictions

Confidence interval estimation for hepatocytes and embryonic fibroblasts. Predicted epigenetic ages for mouse embryonic fibroblasts (green,  $n = 5$ ), young (blue,  $n = 11$ ) and old (red,  $n = 10$ ) hepatocytes are shown in black, based on the liver model sampling the top 1% age-associated CpGs per cell. A confidence interval based on the cell-specific likelihood distribution is shown for 4 different uncertainty parameters. A lower uncertainty parameter value is indicative of a more stringent interval. The mean size of the confidence interval across all cells for each parameter is shown on the left side of each panel. Refer to Extended Data Fig. 4 for additional details regarding cell-specific likelihood distributions.

| Study                                 | Accession | Cell types and number analyzed                                                                              |
|---------------------------------------|-----------|-------------------------------------------------------------------------------------------------------------|
| <b>Gravina et al. (2016)</b>          | SRA344045 | 5 embryonic fibroblasts<br>11 hepatocytes from 4-month-old mice<br>10 hepatocytes from 26-month-old mice    |
| <b>Hernando-Herraez et al. (2019)</b> | GSE121436 | 116 muscle stem cells from 1.5-month-old mice<br>89 muscle stem cells from 26-month-old mice                |
| <b>Angermueller et al. (2016)</b>     | GSE68642  | 16 2i embryonic stem cells<br>65 serum embryonic stem cells                                                 |
| <b>Smallwood et al. (2014)</b>        | GSE56879  | 12 2i embryonic stem cells<br>20 serum embryonic stem cells                                                 |
| <b>Argelaguet et al. (2019)</b>       | GSE121690 | 94 E4.5 embryonic cells<br>101 E5.5 embryonic cells<br>145 E6.5 embryonic cells<br>155 E7.5 embryonic cells |

**Supplementary Table 1: Single-cell datasets analyzed in this study**

Table of studies/datasets of single-cell methylation profiles analyzed in this study. The first author of the study and year of publication are shown in the first column, GEO/SRA accession in the second column, and the cell type and number of cells analyzed in the third column (after coverage filtration, see Extended Data Fig. 9a for additional details).
